# Supplementary material for: Children and Careers: How Family Size Affects Parents’ Labor Market Outcomes in the Long Run
Source: PubMed Central journal article supplement (PMC5624987; doi:10.1007/s13524-017-0612-0), 2017-09-06
Supplement: 13524_2017_612_MOESM1_ESM.pdf [file 13524_2017_612_MOESM1_ESM.pdf]

# Online Resource 1

## Children and Careers: How Family Size Affects Parents' Labor Market Outcomes in the Long Run

Sara Cools, Simen Markussen, Marte Strøm

Table S1: Descriptive statistics for all outcome variables.

|                       | Women       |              |              |              | Men         |              |              |              |
|-----------------------|-------------|--------------|--------------|--------------|-------------|--------------|--------------|--------------|
|                       | <i>1-10</i> | <i>11-20</i> | <i>21-30</i> | <i>31-40</i> | <i>1-10</i> | <i>11-20</i> | <i>21-30</i> | <i>31-40</i> |
| <i>All</i>            |             |              |              |              |             |              |              |              |
| Employment            | 0.75        | 0.82         | 0.76         | 0.53         | 0.92        | 0.89         | 0.79         | 0.51         |
| Work hours            | 20.2        | 23.6         | 21.8         | 14.5         | 30.4        | 29.9         | 26.1         | 15.5         |
| Earnings              | 3.16        | 3.85         | 3.55         | 2.33         | 6.66        | 6.88         | 5.94         | 3.45         |
| Employer above 25p.   | 0.66        | 0.73         | 0.67         | 0.46         | 0.79        | 0.75         | 0.66         | 0.39         |
| Employer above median | 0.43        | 0.47         | 0.42         | 0.26         | 0.70        | 0.68         | 0.59         | 0.34         |
| Employer above 75p.   | 0.18        | 0.19         | 0.16         | 0.09         | 0.46        | 0.44         | 0.37         | 0.20         |
| N                     | 370316      | 530199       | 393818       | 212025       | 351477      | 507880       | 381067       | 206220       |
| Hours if empl.        | 27.2        | 29.1         | 29.3         | 28.2         | 33.3        | 33.9         | 33.5         | 31.6         |
| Highest earnings      | 0.038       | 0.054        | 0.054        | 0.042        | 0.10        | 0.12         | 0.12         | 0.090        |
| Earnings rank         | 0.15        | 0.25         | 0.25         | 0.19         | 0.40        | 0.46         | 0.42         | 0.30         |
| Mean earnings         | 409         | 427          | 423          | 419          | 54.6        | 56.2         | 55.4         | 53.0         |
| N                     | 317505      | 453621       | 318687       | 129803       | 316630      | 428516       | 297733       | 113700       |
| <i>No college</i>     |             |              |              |              |             |              |              |              |
| Employment            | 0.70        | 0.79         | 0.73         | 0.52         | 0.91        | 0.87         | 0.77         | 0.49         |
| Work hours            | 18.3        | 22.2         | 20.6         | 14.0         | 29.8        | 29.1         | 25.1         | 14.7         |
| Earnings              | 2.59        | 3.36         | 3.17         | 2.15         | 5.86        | 5.97         | 5.12         | 2.94         |
| Employer above 25p.   | 0.60        | 0.69         | 0.64         | 0.44         | 0.76        | 0.72         | 0.62         | 0.37         |
| Employer above median | 0.35        | 0.41         | 0.37         | 0.24         | 0.66        | 0.63         | 0.55         | 0.31         |
| Employer above 75p.   | 0.14        | 0.16         | 0.14         | 0.09         | 0.41        | 0.40         | 0.33         | 0.17         |
| N                     | 266834      | 410060       | 324615       | 182133       | 257868      | 382434       | 294992       | 163622       |
| Hours if empl.        | 26.2        | 28.3         | 28.7         | 28.0         | 33.2        | 33.7         | 33.3         | 31.6         |
| Highest earnings      | 0.036       | 0.049        | 0.049        | 0.040        | 0.096       | 0.11         | 0.10         | 0.079        |
| Earnings rank         | 0.11        | 0.20         | 0.21         | 0.17         | 0.35        | 0.40         | 0.36         | 0.25         |
| Mean earnings         | 381         | 406          | 410          | 410          | 512         | 532          | 530          | 518          |
| N                     | 220261      | 342233       | 256438       | 108110       | 228210      | 314537       | 222643       | 84925        |
| <i>College</i>        |             |              |              |              |             |              |              |              |
| Employment            | 0.89        | 0.92         | 0.88         | 0.61         | 0.95        | 0.94         | 0.88         | 0.62         |
| Work hours            | 25.2        | 28.4         | 27.2         | 17.0         | 31.8        | 32.1         | 29.5         | 18.8         |
| Earnings              | 4.62        | 5.55         | 5.31         | 3.39         | 8.89        | 9.65         | 8.74         | 5.41         |
| Employer above 25p.   | 0.81        | 0.86         | 0.82         | 0.54         | 0.87        | 0.85         | 0.78         | 0.50         |
| Employer above median | 0.64        | 0.69         | 0.67         | 0.42         | 0.81        | 0.80         | 0.73         | 0.46         |
| Employer above 75p.   | 0.28        | 0.28         | 0.22         | 0.12         | 0.61        | 0.58         | 0.50         | 0.28         |
| N                     | 103482      | 120139       | 69203        | 29892        | 93609       | 125446       | 86075        | 42598        |
| Hours if empl.        | 28.8        | 31.2         | 31.5         | 29.5         | 33.5        | 34.2         | 33.8         | 31.7         |
| Highest earnings      | 0.043       | 0.068        | 0.078        | 0.055        | 0.11        | 0.15         | 0.16         | 0.12         |
| Earnings rank         | 0.23        | 0.40         | 0.44         | 0.29         | 0.52        | 0.63         | 0.61         | 0.42         |
| Mean earnings         | 473         | 490          | 477          | 464          | 634         | 643          | 623          | 597          |
| N                     | 97244       | 111388       | 62249        | 21693        | 88420       | 113979       | 75090        | 28775        |

Table S2: The effect of same sex on number of children. Effects on subgroups.

|                           | Women                |                      |                      |                      | Men                  |                      |                      |                      |
|---------------------------|----------------------|----------------------|----------------------|----------------------|----------------------|----------------------|----------------------|----------------------|
|                           | <i>1-10</i>          | <i>11-20</i>         | <i>21-30</i>         | <i>31-40</i>         | <i>1-10</i>          | <i>11-20</i>         | <i>21-30</i>         | <i>31-40</i>         |
| <i>Number of children</i> |                      |                      |                      |                      |                      |                      |                      |                      |
| All                       | .038***<br>(0.0012)  | .066***<br>(0.0018)  | .068***<br>(0.0022)  | .068***<br>(0.0029)  | 0.038***<br>(0.0012) | 0.066***<br>(0.0018) | 0.068***<br>(0.0022) | 0.068***<br>(0.0029) |
| N                         | 370316               | 530199               | 393818               | 212025               | 370316               | 530199               | 393818               | 212025               |
| Lower level education     | 0.037***<br>(0.0014) | 0.066***<br>(0.0020) | 0.068***<br>(0.0024) | 0.068***<br>(0.0032) | 0.037***<br>(0.0014) | 0.066***<br>(0.0020) | 0.068***<br>(0.0024) | 0.068***<br>(0.0032) |
| N                         | 266834               | 410060               | 324615               | 182133               | 266834               | 410060               | 324615               | 182133               |
| Higher level education    | 0.038***<br>(0.0023) | 0.064***<br>(0.0038) | 0.066***<br>(0.0052) | 0.068***<br>(0.0080) | 0.038***<br>(0.0023) | 0.064***<br>(0.0038) | 0.066***<br>(0.0052) | 0.068***<br>(0.0080) |
| N                         | 103482               | 120139               | 69203                | 29892                | 103482               | 120139               | 69203                | 29892                |

Figure S1: Effects on earnings, hours and hourly wages, for women without college (left) and women with college (right)

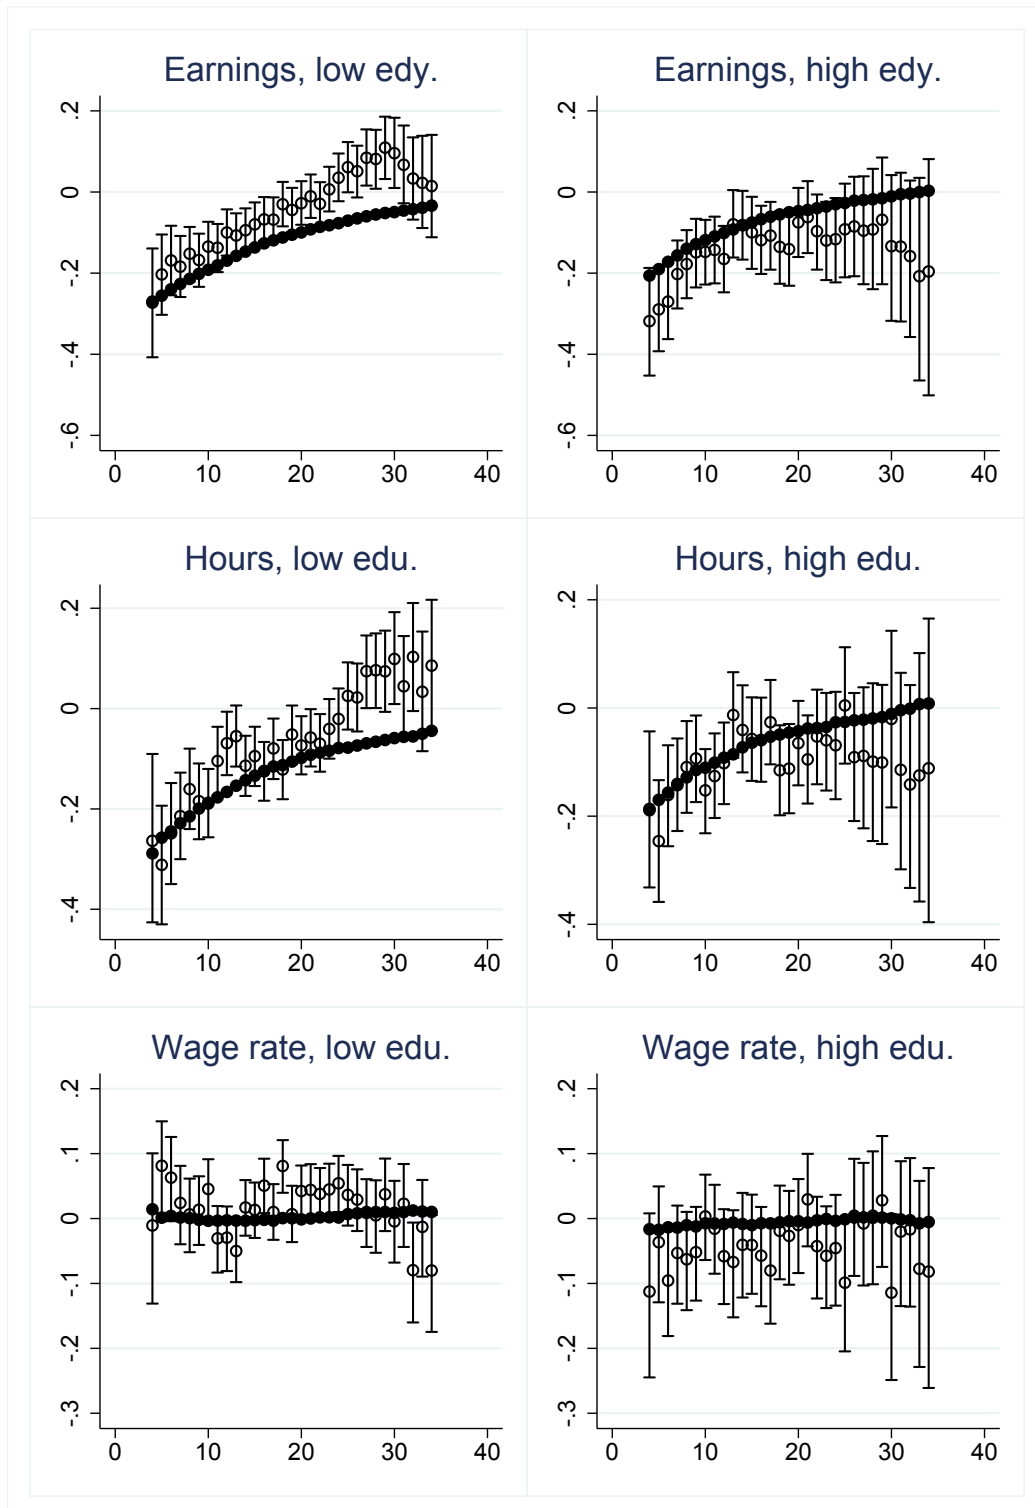

Note: Each open circle in the top and middle panel is the result from a 2SLS estimation of the impact of number of children on the outcome indicated in the header. The filled circles are the corresponding OLS estimates. Error bars give the 90% confidence interval for the estimate. The wage effects in the lower panel are calculated as percentages by log decomposing the change in earnings into a change in hours and a change in the wage rate ( $\log(Y'/Y) = \log(W'/W) + \log(H'/H)$ , where  $Y$  is earnings,  $W$  is wage rate and  $H$  is hours, and for each variable,  $X' = E[X] + \beta$ ). Confidence intervals are obtained by bootstrapping (4000 repetitions).

Table S3: The effect of number of children on women's labour supply and earnings, by birth cohort of the child

|              | All                 |                    |                  |                  | No college          |                    |                   |                  | College            |                    |                   |                    |
|--------------|---------------------|--------------------|------------------|------------------|---------------------|--------------------|-------------------|------------------|--------------------|--------------------|-------------------|--------------------|
|              | 1-10                | 11-20              | 21-30            | 31-40            | 1-10                | 11-20              | 21-30             | 31-40            | 1-10               | 11-20              | 21-30             | 31-40              |
| <i>1970s</i> |                     |                    |                  |                  |                     |                    |                   |                  |                    |                    |                   |                    |
| Employment   |                     | -0.011<br>(0.027)  | 0.034<br>(0.023) | 0.019<br>(0.025) |                     | -0.0015<br>(0.031) | 0.048*<br>(0.026) | 0.044<br>(0.027) |                    | -0.051<br>(0.043)  | -0.049<br>(0.046) | -0.15**<br>(0.060) |
| Work hours   |                     | -2.47***<br>(0.92) | -0.091<br>(0.73) | 0.56<br>(0.76)   |                     | -2.43**<br>(1.04)  | 0.14<br>(0.81)    | 1.02<br>(0.84)   |                    | -2.66<br>(1.79)    | -1.51<br>(1.67)   | -2.32<br>(1.87)    |
| Earnings     |                     | -2.79*<br>(1.60)   | 0.16<br>(1.34)   | 0.10<br>(1.33)   |                     | -1.89<br>(1.73)    | 0.90<br>(1.41)    | 1.00<br>(1.37)   |                    | -7.55*<br>(4.24)   | -4.57<br>(4.16)   | -5.83<br>(4.38)    |
| N            |                     | 144676             | 212025           | 212025           |                     | 122901             | 182133            | 182133           |                    | 21775              | 29892             | 29892              |
| <i>1980s</i> |                     |                    |                  |                  |                     |                    |                   |                  |                    |                    |                   |                    |
| Employment   | -0.12***<br>(0.046) | -0.026<br>(0.020)  | 0.017<br>(0.024) |                  | -0.14**<br>(0.056)  | -0.033<br>(0.023)  | 0.024<br>(0.027)  |                  | -0.11*<br>(0.068)  | -0.0079<br>(0.034) | -0.016<br>(0.047) |                    |
| Work hours   | -5.68***<br>(1.44)  | -1.82***<br>(0.67) | -0.50<br>(0.83)  |                  | -5.52***<br>(1.71)  | -1.85**<br>(0.76)  | -0.16<br>(0.94)   |                  | -7.17***<br>(2.63) | -1.97<br>(1.37)    | -2.16<br>(1.76)   |                    |
| Earnings     | -8.69***<br>(2.36)  | -2.74**<br>(1.33)  | 1.35<br>(1.60)   |                  | -7.24***<br>(2.58)  | -2.14<br>(1.39)    | 2.58<br>(1.65)    |                  | -13.0**<br>(5.49)  | -5.22<br>(3.68)    | -4.93<br>(4.79)   |                    |
| N            | 127100              | 181793             | 181793           |                  | 98252               | 142482             | 142482            |                  | 28848              | 39311              | 39311             |                    |
| <i>1990s</i> |                     |                    |                  |                  |                     |                    |                   |                  |                    |                    |                   |                    |
| Employment   | -0.041<br>(0.033)   | -0.033<br>(0.023)  |                  |                  | -0.041<br>(0.041)   | -0.045<br>(0.028)  |                   |                  | -0.031<br>(0.050)  | -0.0063<br>(0.033) |                   |                    |
| Work hours   | -4.21***<br>(1.07)  | -1.52*<br>(0.80)   |                  |                  | -4.15***<br>(1.27)  | -1.50<br>(0.98)    |                   |                  | -3.85**<br>(1.90)  | -1.54<br>(1.33)    |                   |                    |
| Earnings     | -7.13***<br>(1.97)  | -5.05***<br>(1.73) |                  |                  | -5.16**<br>(2.06)   | -3.49*<br>(1.79)   |                   |                  | -11.9***<br>(4.47) | -8.87**<br>(4.05)  |                   |                    |
| N            | 203730              | 203730             |                  |                  | 144677              | 144677             |                   |                  | 59053              | 59053              |                   |                    |
| <i>2000s</i> |                     |                    |                  |                  |                     |                    |                   |                  |                    |                    |                   |                    |
| Employment   |                     |                    |                  |                  | -0.22***<br>(0.082) |                    |                   |                  |                    |                    |                   | -0.11<br>(0.10)    |
| Work hours   |                     |                    |                  |                  | -7.92***<br>(2.84)  |                    |                   |                  |                    |                    |                   | -5.25<br>(4.13)    |
| Earnings     |                     |                    |                  |                  | -11.3**<br>(5.45)   |                    |                   |                  |                    |                    |                   | -16.1<br>(10.1)    |
| N            |                     |                    |                  |                  | 39486               |                    |                   |                  |                    |                    |                   | 15581              |

Note: Each cell displays the result of a separate OLS or 2SLS estimation of the effect of number of children on women's labour market outcomes. The outcome variable is indicated by the row header and the time interval during which it is measured is indicated by the column header (the number in the header measures years since the birth of the second child). The sample is all Norwegian women who gave birth to a second child between 1970 and 2001.
